# Supplementary material for: X-linked inhibitor of apoptosis inhibits apoptosis and preserves the blood-brain barrier after experimental subarachnoid hemorrhage
Source: PubMed Central journal article supplement (PMC5361183; doi:10.1038/srep44918), 2017-03-22
Supplement: srep44918-s1.pdf [file srep44918-s1.pdf]

**Supplementary Figure**

**X-linked inhibitor of apoptosis inhibits apoptosis and preserves the blood-brain barrier after experimental subarachnoid hemorrhage**

<sup>1\*</sup>Gao Cheng, <sup>1#</sup>Yu Hongwei, <sup>1</sup>Yan Cong, <sup>1</sup>Zhao Wenyang, <sup>1</sup>Liu Yao, <sup>1</sup>Zhang Dongdong, <sup>1</sup>Li Jingwei, <sup>1</sup>Liu Nan

<sup>1</sup>,Department of Neurosurgery, The First Affiliated Hospital of Harbin Medical University, Harbin, Heilongjiang, China

\*Correspondence to [gaocheng7730@163.com](mailto:gaocheng7730@163.com)

#Yu contributed equally to this paper.

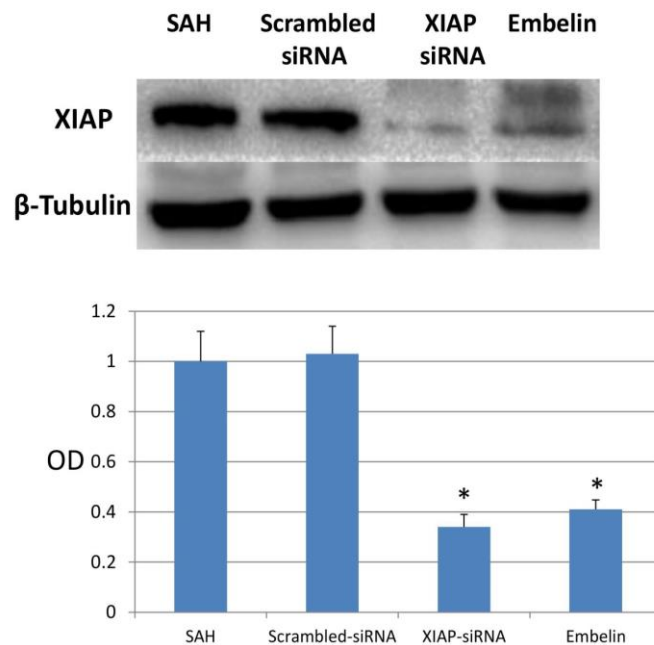

**Supplemental Figure.** Inhibition of XIAP expression by XIAP-siRNA and embelin. XIAP expression was detected at 72 h after SAH, the results showed that XIAP was inhibited by XIAP and embelin obviously. \*, $P < 0.05$  versus SAH and scrambled group.
